# Supplementary material
Source: Springer Nature journal article supplement (https://www.springermedizin.de/resource/supplementary/12885_2013_4066_MOESM1_ESM.pdf/9465232)

**A**Expression of DEK-NUP214 mRNA  
relative to endogenous control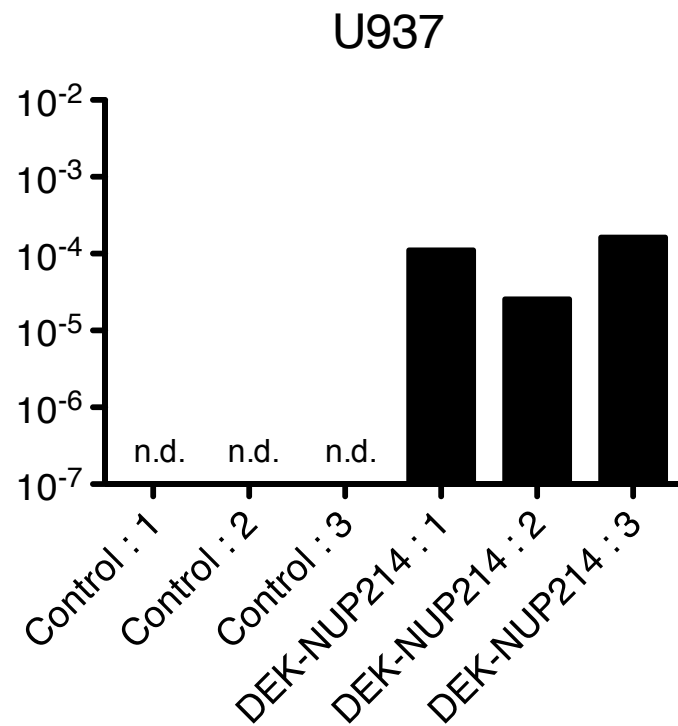**B**Expression of DEK-NUP214 mRNA  
relative to endogenous control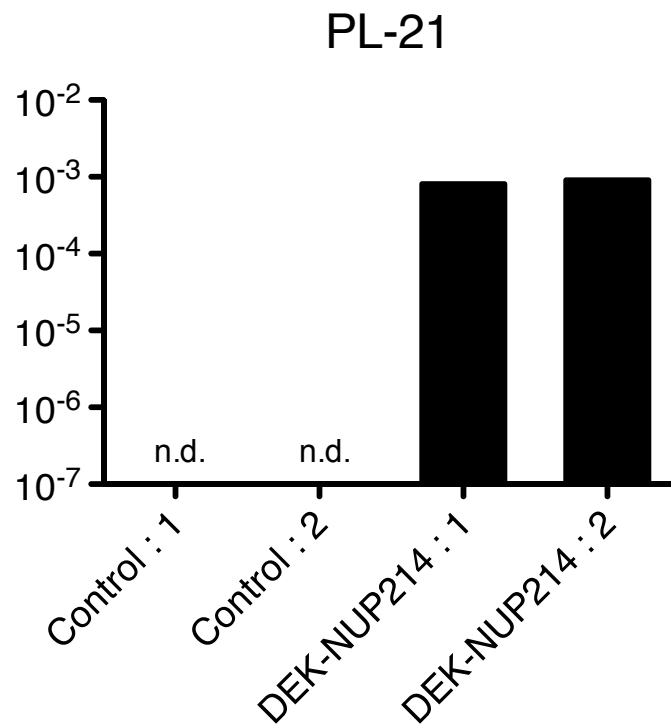**C**Expression of DEK-NUP214 mRNA  
relative to endogenous control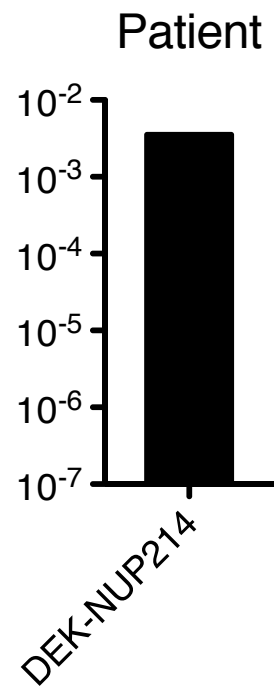

Supplement: MOESM1 [file 9465232]
